# Supplementary material for: Ecophysiological Variability of Alnus viridis (Chaix) DC. Green Alder Leaves in the Bieszczady Mountains (Poland)
Source: PubMed Central journal article supplement (PMC7825132; doi:10.3390/plants10010096), 2021-01-06
Supplement: plants-10-00096-s001.pdf [file plants-10-00096-s001.pdf]

## Supplementary material

**Table S1.** Summary of test stands with geographical coordinates and altitude above sea level.

| Position/Study site<br>(geographical name) | Geographical location                | Elevation (m a.s.l.) |
|--------------------------------------------|--------------------------------------|----------------------|
| Łobozew                                    | N 49° 23' 31.24"<br>E 22° 31' 32.24" | 568                  |
| Przełęcz Wyzna                             | N 49° 08' 56.80"<br>E 22° 33' 04.47" | 980                  |
| Połonina Wetlińska                         | N 49° 09' 36.68"<br>E 22° 32' 43.38" | 1215                 |
| Tarnica                                    | N 49° 04' 35.38"<br>E 22° 43' 34.50" | 1320                 |

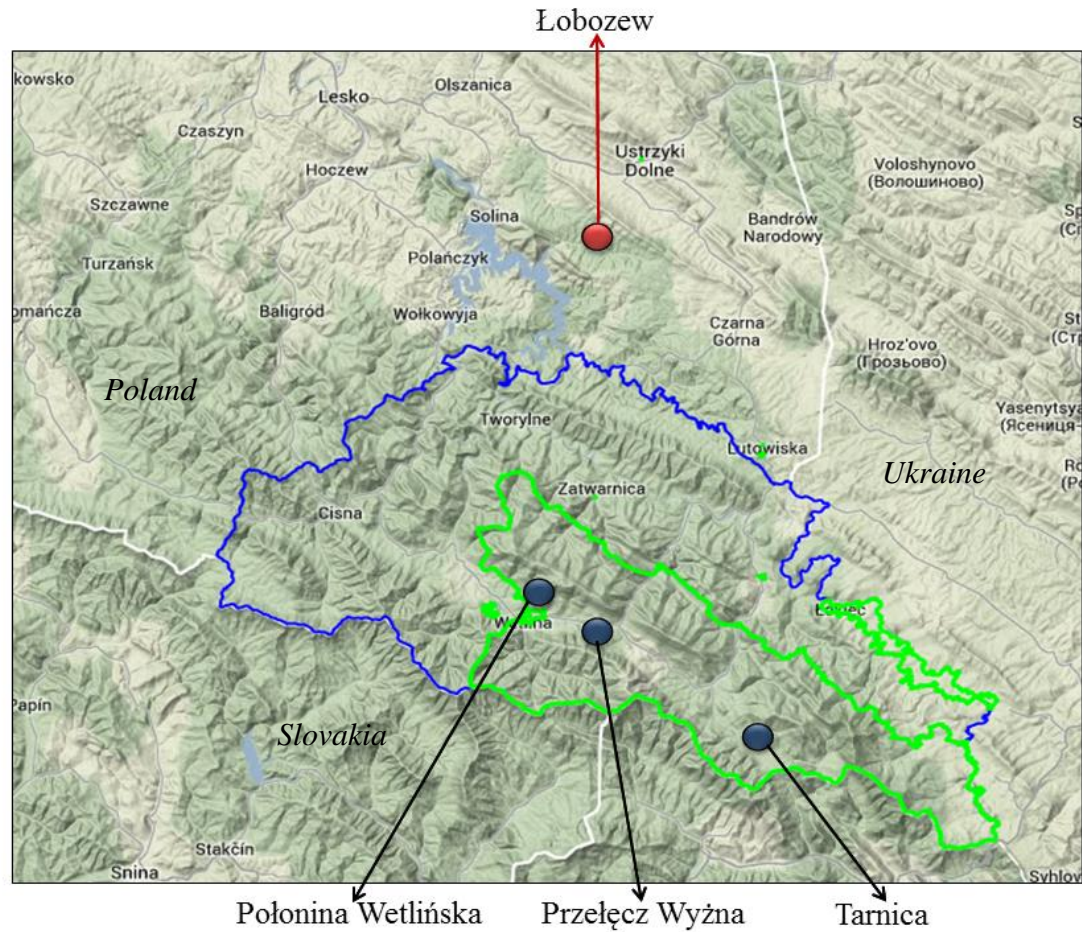

**Figure S1.** Study sites of the *Alnus viridis* (Chaix) DC. on the map. Green colour – the border of the Bieszczady National Park (BNP); blue colour – the border of buffer zone of the BNP; white colour – state borders.



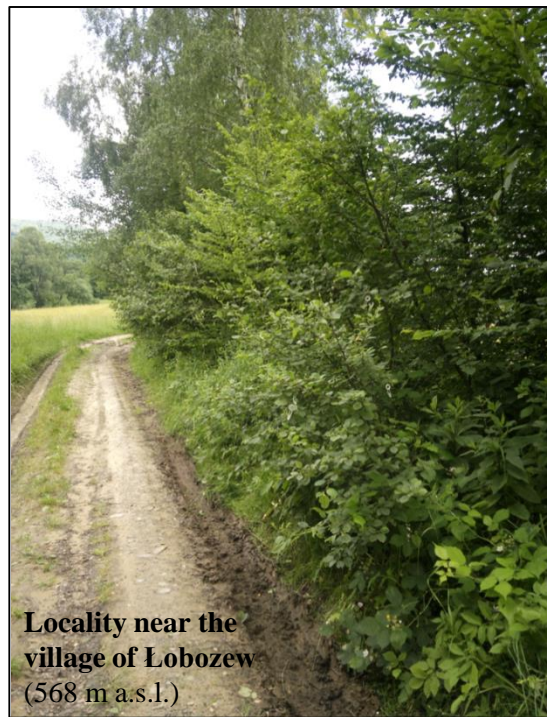

**Locality near the  
village of Lobożew  
(568 m a.s.l.)**

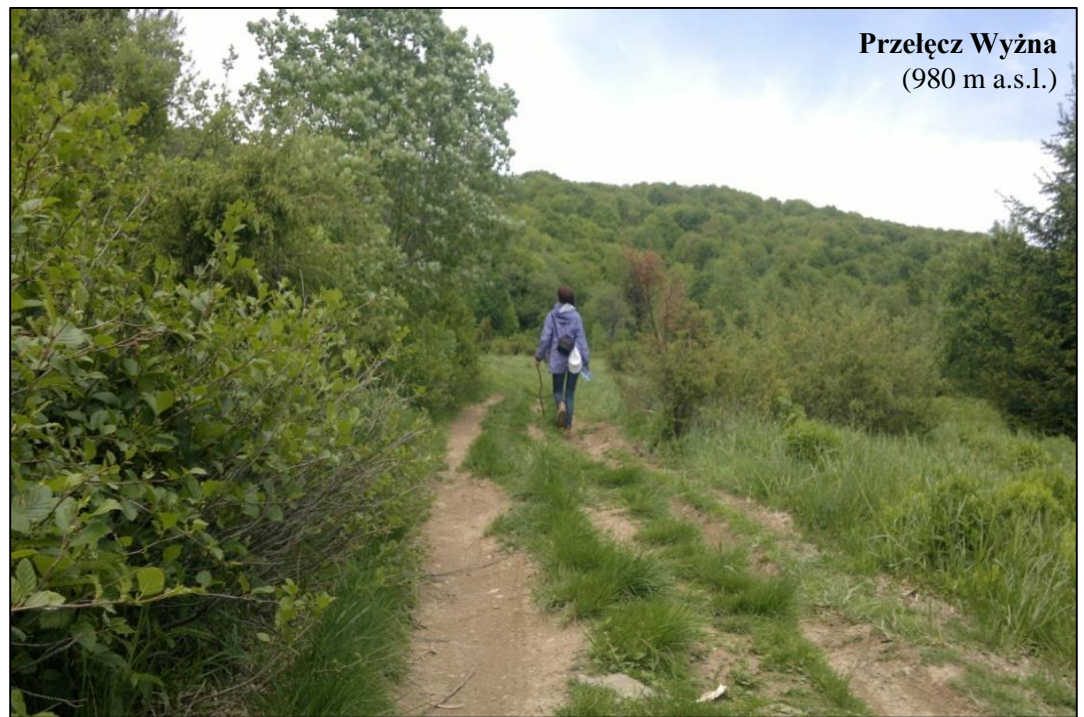

**Przełęcz Wyzna  
(980 m a.s.l.)**

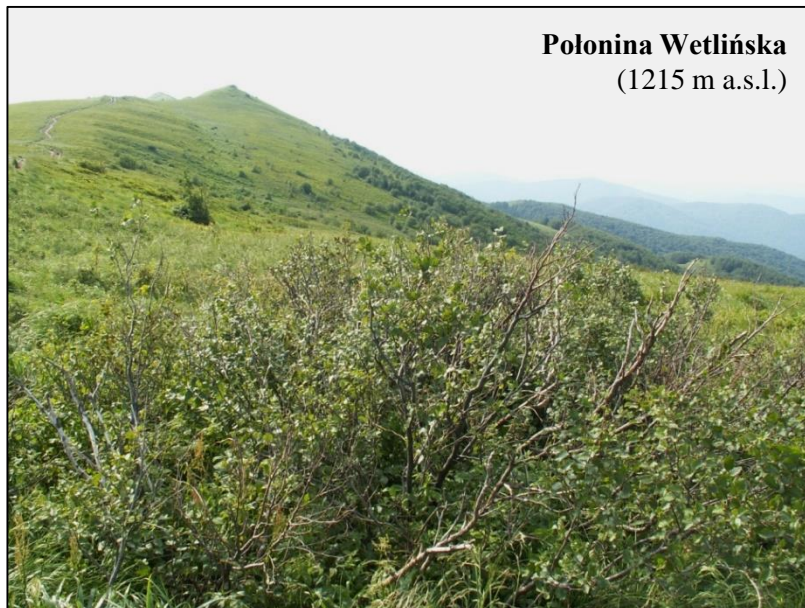

**Polonina Wetlińska  
(1215 m a.s.l.)**

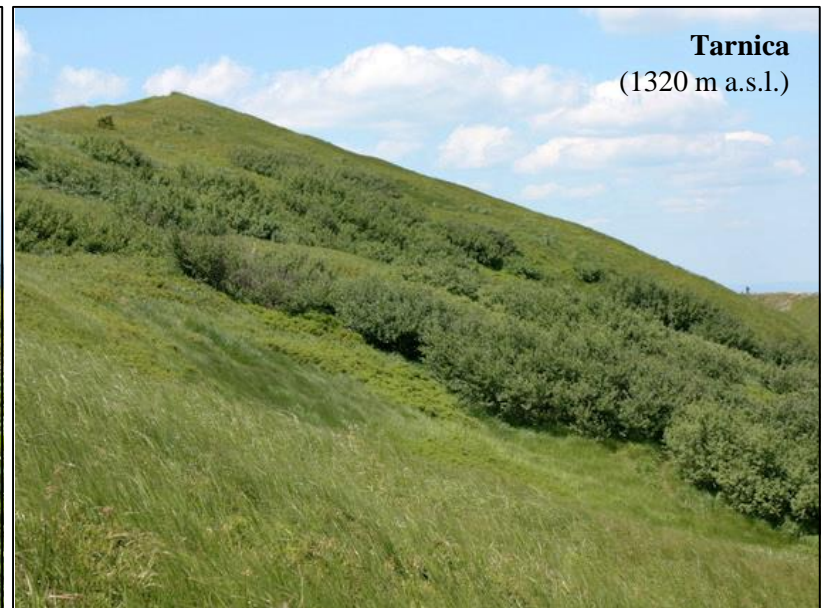

**Tarnica  
(1320 m a.s.l.)**

**Figure S2.** Study sites of the *Alnus viridis* (Chaix) DC. in the Bieszczady National Park (BNP) and buffer zone.
